# Supplementary material for: Effects of morphology of Mg powder precursor on phase formation and superconducting properties of Mg11B2 low activation superconductor
Source: Royal Society of Chemistry journal article supplement (doi:10.1039/c8tc02300j), 2018-01-01
Supplement: c8tc02300j1.pdf [file c8tc02300j1.pdf]

## Supplementary file

Fig. S-1

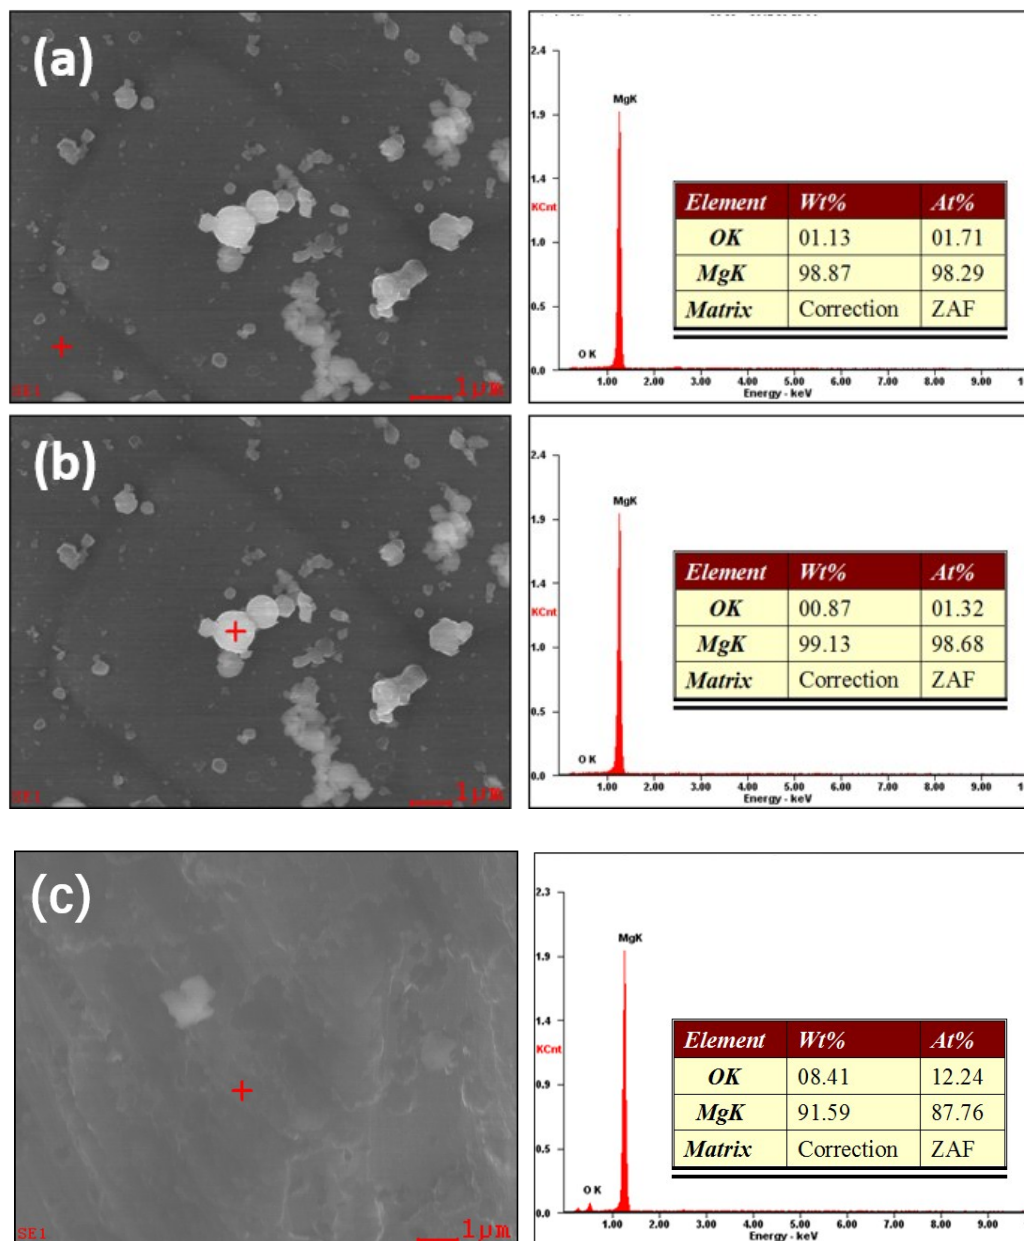

Fig. S-1. The scanning electron micrographs (SEM) and energy dispersive spectrum analysis (EDS) images of (a)(b) the spherical Mg powder in different position, and (c) the plat-like Mg powder.

Fig. S-2

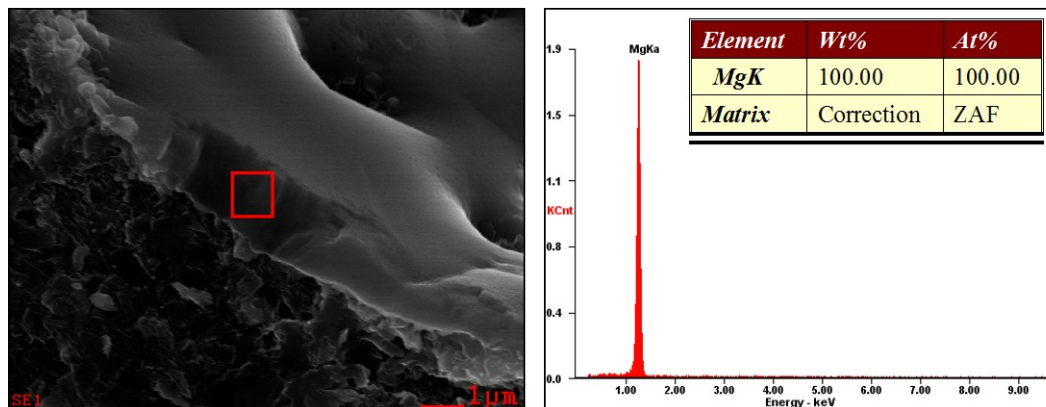

Fig. S-2. The EDS of  $Mg^{11}B_2$  samples using spherical Mg powder sintered at 750°C.
